# Supplementary figures and images for: Influence of Comorbidities on Chronic Obstructive Pulmonary Disease (COPD) Outcomes: Risk Prediction of Acute Exacerbations Using the Cumulative Illness Rating Scale (Cirs)
Source: Preprints.org preprint supplement (doi:10.20944/preprints202311.0401.v1), 2023-11-07

**Figure 1**


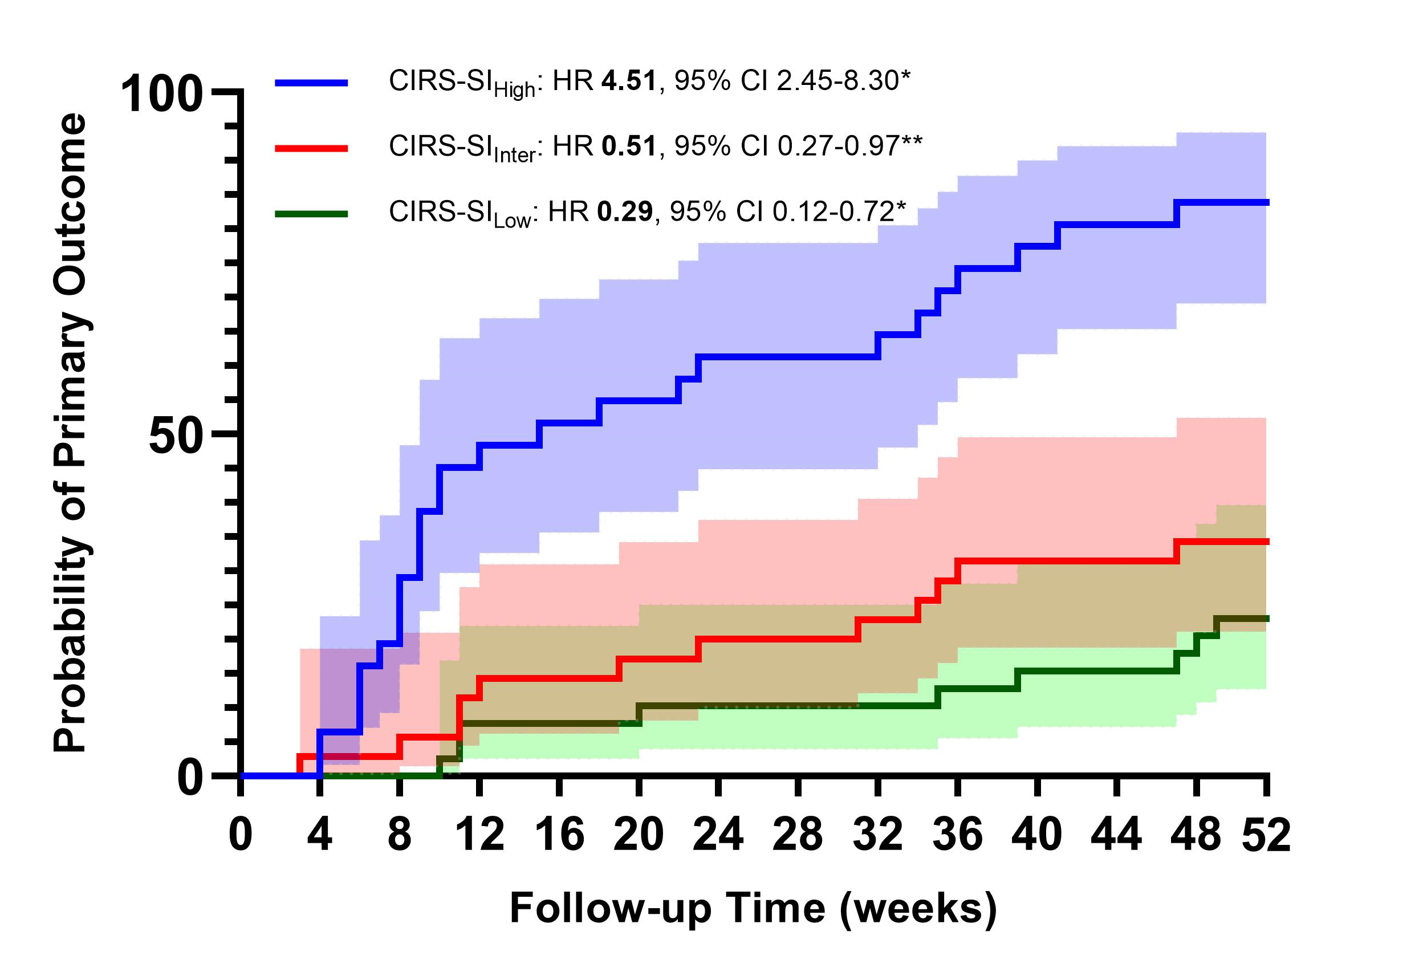


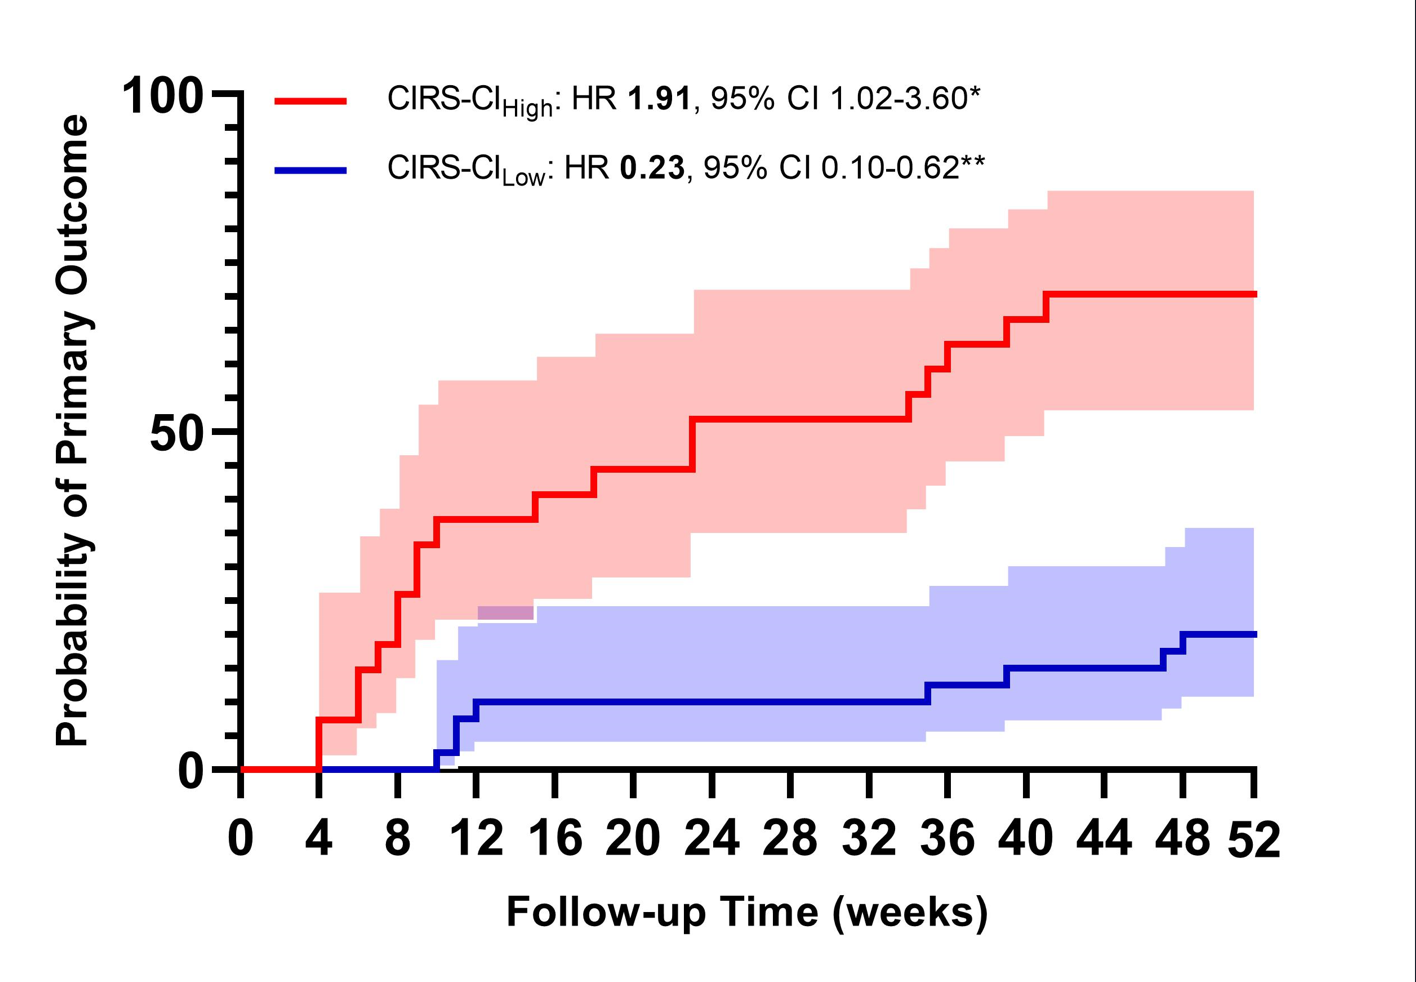
**Figure 2**

Supplement: Supplementary file 1 [file supplementary]
